# Supplementary material for: New measures of deep soil water recharge during vegetation restorationprocess in semi-arid regions of northern China
Source: Copernicus journal article supplement (doi:10.5194/hess-2020-200), 2020-06-29
Supplement: Supplementary file [file hess-2020-200-RC1-supplement.pdf]

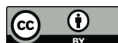

**New measures of deep soil water recharge during vegetation restoration  
process in semi-arid regions of northern China**

Yiben Cheng<sup>1</sup>, Hongbin Zhan<sup>2</sup>, Wenbin Yang<sup>3</sup>, Qunou Jiang<sup>1</sup>, Yunqi Wang<sup>1</sup>, Mingchang Shi<sup>1</sup>

5 <sup>1</sup>School of Soil and Water Conservation, Beijing Forestry University, Beijing 100083, China

<sup>2</sup>Department of Geology & Geophysics, Texas A&M University, College Station, TX 77843-3115, USA.

<sup>3</sup>Institute of desertification control, Chinese Academy of Forestry, Beijing, 100093, China



**Abstract**

Desertification in semi-arid regions is currently a global environmental and societal problem. This research attempts to understand whether a 40-year-old rain-feed *Artamisia sphaerocephala* Krasch sand-fixing land in Three North Shelterbelt Program (3NSP) of China can be developed sustainably or not, using a newly designed lysimeter to monitor the precipitation-induced deep soil recharge (DSR) at 220 cm depth. Evapotranspiration is calculated through a water balance equation when precipitation and soil moisture data are collected. Comparison of soil particle sizes and soil moisture distributions in artificial sand-fixing land and neighboring bare land is made to assess the impact of sand-fixing reforestation. Results show that such a sand-fixing reforestation results in a root system being mainly developed in the horizontal direction and the changed soil particle distribution. Specifically, the sandy soil with 50.53% medium sand has been transformed into a sandy soil with 68.53% fine sand. Within the *Artamisia sphaerocephala* Krasch sand-fixing experimental area, the DSR values in bare sand plot and *Artamisia sphaerocephala* Krasch plot are respectively 283.6 mm and 90.6 mm in wet years, reflecting a difference of more than three times. The deep soil layer moisture in semi-arid sandy land is largely replenished by precipitation-induced infiltration. The DSR values of bare sandy land plot and *Artamisia sphaerocephala* Krasch plot are respectively 51.6 mm and 2 mm in dry years, a difference of more than 25 times. The proportions of DSR reduced by *Artamisia sphaerocephala* Krasch is 68.06% and 96.12% in wet and dry years, respectively. This research shows that *Artamisia sphaerocephala* Krasch in semi-arid region can continue to grow and has the capacity of fixing sand. It consumes a large amount of precipitated water, and reduces the amount of DSR considerably.

**Keywords:** Semi-arid land, *Artamisia sphaerocephala* Krasch, rain-feed vegetation, replantation, infiltration, 3NSP



35      **1. Introduction**

Desertification is currently a global environmental and societal concern (Reynolds et al., 2007b). Arid region covers about 41% of the Earth's surface, and supports more than 38% of the world's population. 20% of these areas have experienced serious land degradation, which is expected to affect the survival of 250 million people (Reynolds et al., 2007a; Dregne and  
40 Chou, 1992; D'Odorico et al., 2013). In 1992, the United Nations adopted the International Convention to Combat Desertification in order to focus on desertification issues (Bestelmeyer et al., 2015). With no exception, China is also facing severe desertification problems (Liu and Diamond, 2005). Up to 2010, the total desertification area in China is 2,623,700 km<sup>2</sup>, which is 27.33% of the country's entire land area. Among this, the arid region desertification area is  
45 1,158,600 km<sup>2</sup> (44.16% of the total desertification area of China), the semi-arid region desertification area is 971,600 km<sup>2</sup> (37.03% of the total desertification area of China), and the sub-humid arid region desertification area is 493,500 km<sup>2</sup> (18.81% of the total desertification area of China). To battle desertification, an effective prevention and control measure is to build shelterbelts, using artificial sand-fixing vegetation (Tao, 2014).

50      The Three North Shelterbelt Program (3NSP), a reforestation program initiated in 1978 in Northeast, Northwest, and North China is the largest shelterbelt project in China (Wang et al., 2004; Wang et al., 2010b). It has been constructed for 40 years, and plays a key role for desertification prevention in Northeast, Northwest, and North China (Li et al., 2004). The shelterbelts of 3NSP have slowed down, halted, and even reversed the desertification process  
55 in Northern China (Zha and Gao, 1997; Wang et al., 2012). According to NASA's latest observations, the restoration of vegetation has shown some signs of reversing the trend of desertification in China, accounting for a quarter of the Earth's new green areas (Chen et al., 2019).



It is unquestionable that the implementation of 3NSP in China has reduced aeolian erosion,  
60 and improved the overall living environment in the impacted regions (Hanjie and Hao, 2003).  
However, it is undeniable that the poor choices of vegetation species in some areas of 3NSP  
has resulted in consumption of a large amount of water resources, causing shortage of water  
supply to meet other needs, thus threatening the sustainable development of the regions (Wang  
et al., 2010a). Furthermore, a high planting density in some areas resulted in the death and/or  
65 malfunction of a large number of trees (Duan et al., 2011). In contrast, shrubs and herb sand-  
fixing vegetation appear to grow healthily, thus receive great interests to become proper  
choices of vegetation species for desertification prevention (Tao, 2014).

To understand the impact of afforestation to the ecohydrological system, thus to assess  
the long-term sustainability, especially after vegetation reconstruction, we need to know how  
70 the soil moisture changes in these area. We select a typical semi-arid area in 3NSP for this  
research. *Artamisia sphaerocephala* Krasch (ASK) is a unique Chinese native sand-fixing shrub  
plant with strong adaptability (Wang et al., 2013). ASK sand-fixing land developed on top of  
bare sandy land has increased evapotranspiration. Meanwhile, because of the form of an  
organic-rich biofilm commonly seen in ASK forest, the near surface soil permeability has been  
75 reduced (Su and Lin Zhao, 2003). This will reduce the soil infiltration capacity, resulting in the  
concentration of soil moisture in shallow soils, and reducing the replenishment of soil moisture  
in deep soils. In order to understand the soil moisture variation and deep soil recharge (DSR)  
changes resulted from ASK sand-fixing forest, this research choose a 40-year-old ASK sand-  
fixing land as the experimental site. This research focuses on monitoring precipitation-induced  
80 infiltration, soil moisture distribution, and DSR changes in ASK sand-fixing land. We have  
also conducted a comparative research using a bare sandy land 400 m away from the ASK  
sand-fixing land site.

## 2. Material and Methods



## 2.1 Research area description

85 Figure 1 shows the research site which is located in Ejin Horo Banner, on the Eastern  
margin of Mu Us Sandy Land in the Ordos basin of China, with a geographic location of  
39°05′02.8 N, 109°35′37.9 E, and an altitude of 1303 m above mean sea level (m.s.l.). The  
groundwater table between sand dunes are 5.3-6.8 m below ground surface. The climate is  
within the semi-arid continental monsoon climate zone. Annual precipitation concentrates from  
90 July to September and is highly sporadic. The average annual precipitation from 1960 to 2010  
is 358.2 mm. The average annual temperature of this area is 6.5°C, with about 151 days of  
frost-free season, and the lowest temperature is -31.4 °C. The average annual potential  
evapotranspiration is 1809 mm, the average annual sunshine is 2900 hours, and the average  
annual wind speed is 3.24 m/s. The research area is located in relatively gentle mobile dunes,  
95 and the soil type is aeolian sandy soil (Liu et al., 2015).

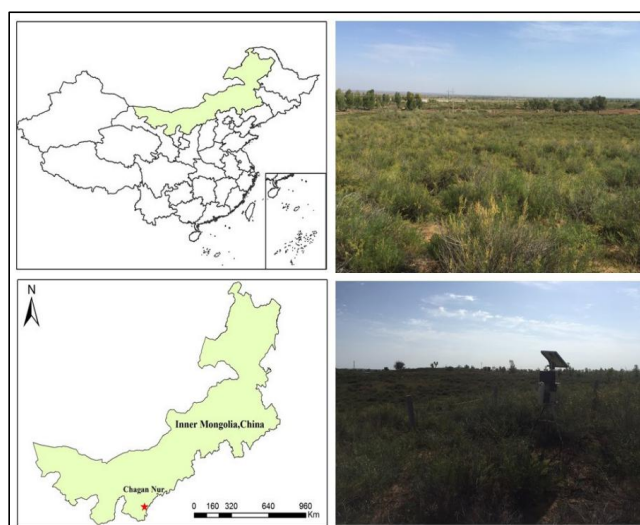

Figure 1. Overview of the experimental field.

## 2.2 Experimental design

### 2.2.1 Root system distribution survey, soil moisture and DSR monitoring



100 This research chooses five ASK plants with similar heights and crown widths, in which  
the heights are around 60 cm above the ground. Using the whole root system excavation  
method, the plant soil is excavated layer by layer with a 20 cm vertical interval, until there are  
no observable roots. As the deepest root is at a depth of 120 cm (the root system will be  
discussed in details later in this section), ~~thus~~ the deepest soil moisture that the plant can utilize  
105 is 180 cm (120 cm root depth plus 60 cm capillary rise, where the capillary rise is calculated  
based on the soil texture from experimental plot) (Cheng et al., 2017). The 180 cm depth can  
be regarded as the maximal depth of evapotranspiration. A new lysimeter is used to measure  
the deep infiltration, or deep soil recharge (DSR) at a depth of 220 cm (to avoid root water  
absorption), 40 cm below the maximal depth of surface evapotranspiration. The newly  
110 designed lysimeter is improved on the basis of the traditional lysimeter, but it has a reduced  
size and a new water balance part to improve the measurement accuracy. As shown in the  
Figure 2, the measurement surface is transferred from the soil surface to soil layer at any  
designated depth. The detailed explanation of such a lysimeter has been documented in a  
previous research of Cheng et al. (2017) and will not be repeated here. To understand the soil  
115 condition in the research site, the sandy soil samples are collected using a ring cut method,  
layer by layer with a 20 cm vertical interval, until reaching a 220 cm depth. Soil particle size  
distribution measurements are conducted using a laser particle size analyzer (Mastersizer 2000,  
Malver, U.K.). We use EC-5 soil moisture probe to measure every 20 cm soil layer of the first  
100 cm depth, and every 40 cm soil after the first 100 cm depth until reaching 220 cm depth.  
120 The reason of doing so is because the shallow soil layer has roots thus is monitored more  
closely while the deep soil is relatively uniform and has less roots, thus can be monitored more  
sparsely.

To study the soil water dynamics of ASK, we selected a typical ASK plot in the Mu Us  
Sandy Land and an adjacent bare sandy plot as a comparison study to quantify the differences



125 in the characteristics of soil water dynamics in bare sandy plot and ASK plot. The experimental design is shown in Fig.2 and explained sequentially as follows. Firstly, in order to minimize the disturbance of the original soil structure, we need to water both plots in advance before installing the instruments. Watering the soil in the test area makes the relatively dry sandy soil stable and easy to excavate, as the native dry sandy soil is relatively loose. Secondly, after  
130 watering the ASK plot, we start to excavate a soil profile vertically downward at a distance of 1 meter from the main branch of ASK, reaching a depth of 3.2 meters. After this, at the depth of 3.2 meters, we excavate horizontally toward the location of the main branch of ASK to a distance about 1.3 m. Eventually, a body with a height of 1 m, a length and width both of 0.3 m is excavated to install the lysimeter right below the main branch of ASK. By doing so, the  
135 distance from the ground surface to the top of lysimeter is 220 cm, and the root system (which is less than 220 cm deep) will not be disturbed. Meanwhile, as the plot has been watered to make the soil stable, no collapse of soil has occurred during the installation of the lysimeter. Thirdly, after putting the lysimeter in place, we use in-situ soil to backfill. During this process, one needs to continuously water each layer of backfill to ensure that the soil is relatively  
140 compact. For the installation of lysimeter in the bare sand plot, it is straightforward as one does not need to worry about the disturbance of integrity of the root system. For such a plot, one can water the soil first, then excavate a square of 1 meter by 0.3 meters to a depth of 3.2 meters to install the lysimeter. After the installation of lysimeter, one can backfill using native soil, making sure to continuously water each layer of backfill to ensure the soil compaction. Soil  
145 moisture probes are installed at different depths for both plots. Finally, wait for the watered plots to stabilize to its pre-excavation status, since pre-watered sandy plot and excavated sand layer will take six months to settle down and meet the requirements of the experiment. Then one can start the experiments.

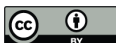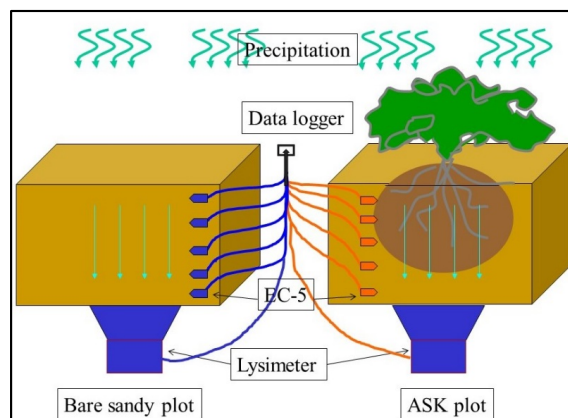

150

Figure 2. Design of Precipitation-DSR observation site

### 2.2.2 Water balance of rain-fed ASK forest land

When precipitation reaches ground surface in semi-arid sandy land, the infiltration rate is usually unpredictable, it may evaporate or run away, or infiltrate. Years of observation records in the area show no occurrence of surface runoff. The water infiltrating into the soil goes through a redistribution process. Part of it is absorbed and utilized by plants' root system, and part of it is stored in soils as soil moisture. The rest will infiltrate passing the maximal depth of evapotranspiration depth and eventually recharges the groundwater system. This research uses the following water balance method to calculate moisture distribution at different depths:

160

$$P + C_m \cdot d - \text{DSR} - E = \pm \Delta W \quad (1)$$

where  $P$  is annual precipitation (mm) measured by a rain gauge as the volume per unit square meters,  $C_m$  is soil volumetric moisture content ( $\text{m}^3/\text{m}^3$ ),  $d$  is soil column depth to be measured (mm), DSR is annual deep soil recharge (mm), measured by the newly designed lysimeter as the volume per unit square meters,  $E$  is annual evapotranspiration (mm) which is the volume of water lost to the atmosphere due to evapotranspiration per square meters, and  $\Delta W$  is the annual soil moisture storage change per unit square meters (mm).

165



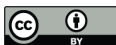

### 3. Results

#### 3.1 Root system distribution

This research selects representative plants and excavate the soil profile to research the ASK  
170 root system growth range. The results show that the ASK root system distribution is umbrella-  
shaped, as shown in Table 1. The root system distribution range mainly concentrates within 0-  
60 cm depth, and can reach as deep as 120 cm. The main root grows through the entire depth.  
The lateral roots are distributed around the main root and can reach a 200 cm diameter  
horizontally. The density of lateral roots gradually decreases when moving away from the  
175 central main root. The lateral roots mainly concentrate within depths of 20-60 cm. From ground  
surface to a depth of 40 cm, the root system gradually increases, and reaches the maximum  
density at the 40 cm depth. The dry weight of root between 20-40 cm layer is 51.77% of the  
weight of the entire root system. The root system gradually decreases after depths of 40 cm,  
with the deepest root system depth of 120 cm. The results show that the ASK root system in  
180 this area is mainly developed in the horizontal direction, which confirms that rainfall is the  
main water supply for plants in the Mu Us Sandy Land. This conclusion is based on the  
following reasons. The root development of plans is closely dependent on the source of water  
supply for the root system, and there are generally two sources of supply: a) rainfall-induced  
downward infiltration and b) uptake of groundwater from the underneath soil and aquifer. If  
185 the primary source of supply for the ASK root system comes from the deep groundwater table,  
then the root prefers to grow vertically in order to access the underneath groundwater. On the  
other hand, if the primary source of supply for the root system comes from the rainfall-induced  
infiltration, the root system prefers to grow horizontally to maximize the intercept of such  
infiltrated water, and the field observation results confirm that this is the case in Mu Us Sandy  
190 Land.



Table 1. Root distribution of the ASK in the vertical direction

| Excavation depth(cm) | Root dry matter content (g) | The dry matter accounts for the weight ratio of the whole root system (%) |
|----------------------|-----------------------------|---------------------------------------------------------------------------|
| 0-20                 | 21.85                       | 13.26                                                                     |
| 20-40                | 85.32                       | 51.77                                                                     |
| 40-60                | 30.56                       | 18.54                                                                     |
| 60-80                | 14.86                       | 9.02                                                                      |
| 80-100               | 8.57                        | 5.2                                                                       |
| 100-120              | 3.64                        | 2.21                                                                      |

### 3.2 Effect of ASK on soil development

There are many factors that affect the soil particle size, including soil crust, vegetation root  
195 secrete acidic substances to decompose the parent material, ionic strength, flow rate and surface  
vegetation fixed sand dust (Yan et al., 2013; Yu et al., 2013; Zhang et al., 2011). The soil particle  
size of each layer is also different. It is necessary to analyze each soil layer one by one and it  
is not easy to see the main affecting factors. In this research, to understand the impact of ASK  
on the local soil, the ASK soil samples and bare land soil samples are collected and sorted  
200 based on U.S. Department of Agriculture's soil particle size grading scheme, we collected  
samples of every 20 cm depth and mixed them together, treated the entire 220 cm thick soil  
layer each as a homogenized system.

The soil particle size distribution was measured using the MS2000 soil particle size  
analyzer produced by Malvern, UK. Samples need to be pretreated before the experiment. All  
205 soil samples have passed through a 2 mm soil sieve, added 30% H<sub>2</sub>O<sub>2</sub> solution to remove  
organic matter (including biological crust) from the sample, then add NaHMP solution to fully  
dissolved, and shake 30 seconds to destroy the microaggregate structure of the soil particles.



Table 2 shows the particle size distributions in both the ASK plot and bare sandy plot. Overall, in ASK plot, the medium sand is 19.26%, the fine sand is 68.53%, the very fine sand  
210 (or powder sand) is 9.35%, and silt is 2.86%. The soil particle size distributions of the bare sandy plot are as follows. The coarse sand is 3.23%, the medium sand is 50.53%, the fine sand is 36.06%, the very fine soil is 7.19%, and the silt is 2.99%. Comparing the results in ASK plot and bare sandy plot, one can see that the main soil type in the ASK plot is fine sand (68.53%), and the main soil types in bare sandy plot is medium (50.53%) and fine sands (36.06%).  
215 Another notable point is that there is 3.23% of coarse sand in the bare sandy plot, but no coarse sand in the ASK plot.

There are clear evidences that the sand-fixing vegetation changes the particle size distribution of the soil (Fearnehough et al., 1998; Pei et al., 2008). A few possible reasons may be responsible for such a change. First, the fine-sand in the 220 cm-thick soil of the bare sandy  
220 land is easily removed or eroded from its original position under the force of wind, which initiates sand movement both horizontally and vertically (as suspended particles carrying away by wind), consequently the content of fine sand in the bare sandy land decreases, and the soil structure continuously coarsens. In contrast to this, the content of fine particle in the ASK plot is significantly higher than that in the bare sand. This is largely due to the presence of vegetation  
225 in the ASK plot which has substantially subdued the eroding force of wind. In another word, ASK essentially protects the fine sands in the soil to be removed or eroded by wind force. This observation is direct evidence showing that vegetation has a positive role in improving soil particle size composition by maintaining the fine sand particles in the plot. However, one must also be aware that such a change of particle size distribution is a consequence of a complex  
230 interplay of aerodynamic force, sand mass movement mechanics, and root-soil interaction force, which are not completely understood up to now and needs further investigation.



Table 2. The distribution of soil particle size in research site

| Particle size distribution | Extra coarse sand | Coarse sand | Middle sand | Fine sand | Very fine sand | Silt sand |
|----------------------------|-------------------|-------------|-------------|-----------|----------------|-----------|
| Diameter range (mm)        | >1.0              | 1.0-0.5     | 0.5-0.25    | 0.25-0.1  | 0.1-0.05       | <0.05     |
| ASK plot                   | 0.00              | 0.00        | 19.26       | 68.53     | 9.35           | 2.86      |
| Bare sandy plot            | 0.00              | 3.23        | 50.53       | 36.06     | 7.19           | 2.99      |

### 3.3 Annual soil moisture variation of rainfed ASK plot

235 The experimental area is located in Northern China, with more than three months of intermittent frozen soil period in winter. Multi-year observations show that the frozen soil period is from December of the previous year to March of the following year. The annual soil moisture variation in 2015 is shown in Figure 3. According to the change of soil volumetric water content and the influence of precipitation, the whole year is divided into five stages, which are the thawing recharge period, germination consumption period, rain season recharge period and plant dormancy period (the frozen soil period is not shown in Figure 3). From 2015 to 2018, the trend of soil moisture is basically the same, only the time of the rainy season and the amount of annual precipitation are different.

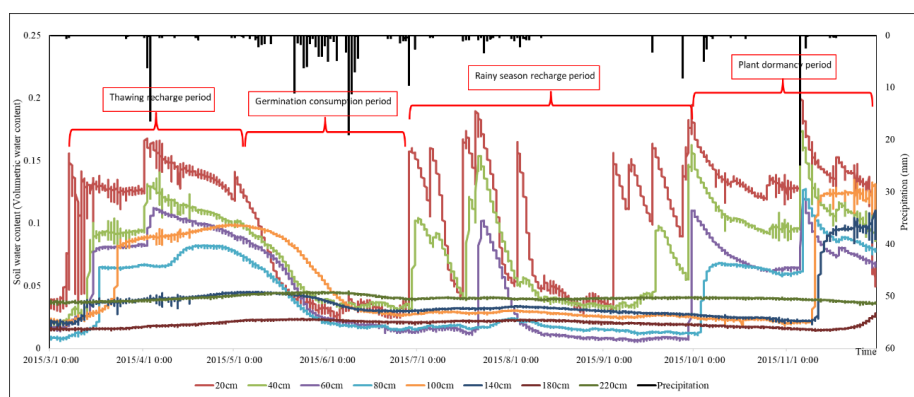

245 Figure 3 Daily soil water content distribution of ASK plot in 2015.

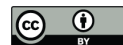

After March 6<sup>th</sup>, the melting snow in ground surface leads to increased soil moisture contents. Around this time, ASK is still in winter dormancy, and does not absorb soil moisture. As shown in Figure 3, from March 6<sup>th</sup> to May 5<sup>th</sup>, soil moisture increases significantly. Soil moisture resulted from melting snow can infiltrate into depths of 100 cm to 140 cm. After April 25<sup>th</sup>, ASK starts germination, and soil moisture gradually decreases. From April 25<sup>th</sup> to June 27<sup>th</sup>, there are 31 observed precipitation events in total. The maximum precipitation is 18.8 mm, and the minimum precipitation is 0.2 mm. However, these precipitation events did not change the decreasing trend of soil moisture. This means that during the germination and early growth periods, the moisture absorbing capacity of the ASK root system is extremely high. There is a 9.4 mm precipitation event on June 28<sup>th</sup>, and the infiltration associated with this event can reach a depth of 20 cm. This means that the growth of ASK starts to slow down around this time, and the shallow soil moisture starts to increase. In October, temperature drops and ASK starts to enter winter dormancy. There is a 4.2 mm precipitation event on October 4<sup>th</sup>, and the infiltration associated with this event can reach a depth of 60 cm. There is a 24.6 mm precipitation event on November 7<sup>th</sup>, and the infiltration associated with this event can reach a depth of 140 cm. Soil moisture at 220 cm depth changes very mildly. The results show that though DSR occurs in all seasons, especially during freeze-thaw period, due to vegetation consumption, the amount of DSR is relatively small.

### 3.4 Effects of annual precipitation on soil moisture and DSR

#### 3.4.1 Comparison of DSR on rain-feed ASK land and bare sandy land

For deep soil moisture variation and distribution, this research uses a newly designed lysimeter to measure DSR on-site (Cheng et al., 2017). The soil layer may be disturbed after the instrument is installed in 2015, so the 2015 precipitation-infiltration data are not used in this study. Results are shown in Table 3. From 2016-2018, the precipitations of bare sandy land



270 are 464.8 mm, 313.4 mm, 245.2 mm, and DSR are 283.6 mm, 67.6 mm, 51.6 mm, respectively.  
The ratios of DSR to annual precipitation are 60.02%, 21.57%, 21.04%, respectively. The  
experimental plot of Artamisia is less than 100 m away from the bare sandy land plot, the  
annual precipitation is basically the same, and DSR values are 90.6 mm, 31.2 mm, 2 mm,  
respectively. The ratios of DSR to annual precipitation are 19.49%, 9.96%, 0.82%, respectively.  
275 According to above data, DSR of the bare sandy land is obviously higher than the Artamisia  
plot. On Artamisia plot, the interception of the aboveground vegetation, root absorption,  
evapotranspiration consumes a large amount of water resources, which affects the production  
of DSR.

Table 3. Comparative of precipitation and DSR in ASK land and bare sand field

| Year | Field type     | Precipitation (mm) | DSR (mm) | D/P (%) |
|------|----------------|--------------------|----------|---------|
| 2016 | Bare sand plot | 464.8              | 283.6    | 60.02   |
|      | ASK plot       | 464.8              | 90.6     | 19.49   |
| 2017 | Bare sand plot | 313.4              | 67.6     | 21.57   |
|      | ASK plot       | 313.4              | 31.2     | 9.96    |
| 2018 | Bare sand plot | 245.2              | 51.6     | 21.04   |
|      | ASK plot       | 245.2              | 2        | 0.82    |

280 As shown in Table 3, 2016 is a wet year, 2017 is a normal year, and 2018 is a dry year. In  
the wet year, the deep soil moistures of the two experimental sites were greatly supplemented,  
and the effect of bare sand was more obvious. The amount of DSR in the dry years is  
significantly reduced on both plots, especially in the Artamisia plot, from 90.6 mm in wet years  
to 2 mm in dry year. Based on these, one can conclude that in semi-arid areas, though vegetation  
285 cover can fix mobile sand dunes, it consumes a lot of water resource. Bare sandy land can  
transport large amounts of water resource to shallow groundwater.

### 3.4.2 Precipitation response to soil moisture and DSR on two experiment plots

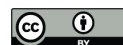

The relationship between precipitation and soil moisture content fluctuations and DSR in 2016 is shown in Figure 4 (ABCD). There are 84 precipitation events throughout the year in 2016, with the maximum precipitation amount of 137.2 mm/d happened on July 10<sup>th</sup>. According to local weather station data, this is the second largest daily precipitation since 1950, and the minimum precipitation amount of 0.2 mm/d happened 11 times throughout the year. On bare sandy land, there are 138 infiltration events throughout the year in 2016, with the maximum DSR amount of 24 mm/d, happened on July 11<sup>th</sup>, and the minimum DSR amount of 0.2 mm/d happened 25 times throughout the year. On ASK plot, there are 42 infiltration events throughout the year in 2016, with the maximum DSR amount of 27 mm/d, happened on July 13<sup>th</sup>, and the minimum DSR amount of 0.2 mm/d happened 22 times throughout the year. The comparison of these two sets of DSR data shows that ASK can substantially reduce the soil moisture infiltration, DSR of Artamisia plot is reduced by 68.05% compared to bare sandy plot. Heavy precipitation completely wets the entire soil layer and forming a moisture transport channel that facilitates the transport of moisture throughout the soil layer. In bare sandy land, as the entire soil layer is wet, the subsequent small precipitation can also replenish the deep soil layer moisture, as shown in Figure 3A. In the experimental area of Artamisia plot, heavy rainfall wets the entire soil layer, but for the root system soil water consumption, the subsequent small precipitation cannot significantly replenish the deep soil moisture, as shown in Figure 4D.

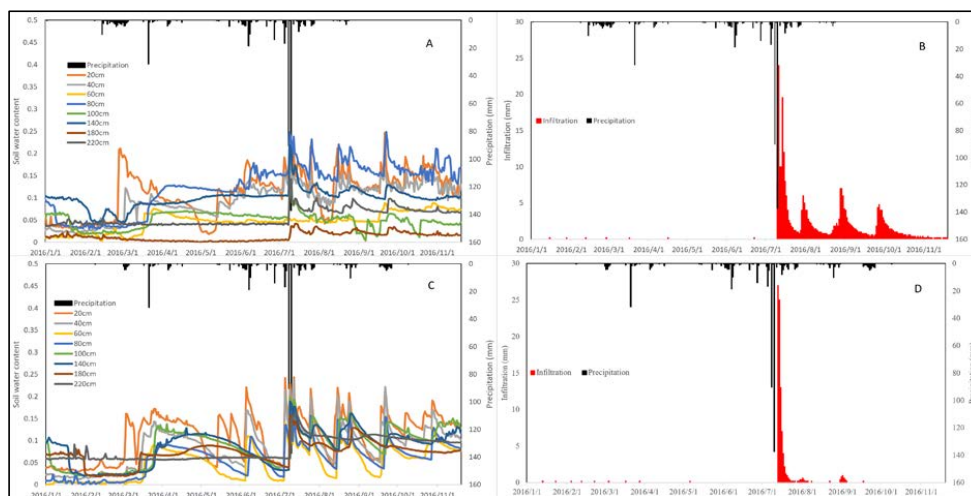

Figure 4. Effects of precipitation on soil moisture (A) and DSR (B) in bare sandy land plot; Effects of precipitation on soil moisture (C) and DSR (D) on ASK plot, 2016.

310 The relationship of precipitation on soil moisture and DSR in bare sandy land plot and ASK  
plot of 2017 is shown in Figure 5(A-D). There are 94 precipitation events throughout the year  
in 2017, with the maximum precipitation amount of 18.8 mm/d happened on June 29<sup>th</sup>, and the  
minimum precipitation amount of 0.2 mm/d happened 24 times throughout the year. On bare  
sandy land, there are 178 infiltration events throughout the year in 2017, with the maximum  
315 DSR amount of 8 mm/d, happened on August 23<sup>th</sup>, and the minimum DSR amount of 0.2 mm/d  
happened 128 times throughout the year. On the ASK plot, there are 52 infiltration events  
throughout the year in 2017, with the maximum DSR amount of 1.6 mm/d, happened on  
September 5<sup>th</sup>, and the minimum DSR amount of 0.2 mm/d happened 21 times throughout the  
year. There were only 6 times of infiltration in bare sand plot from January to April in 2016,  
320 and 50 times in 2017, as shown in Figures 4 and 5. Since the surface is frozen at this time, there  
will be no surface infiltration. The source of infiltration in the first three months is essentially  
from the soil layer reservoir of 2016. One can speculate that the accumulation of water in the  
soil in the previous year can continue to infiltrate to the second year. This also makes it difficult  
to subdivide which precipitation process induced how much soil water content. In 2017, there





325 was less precipitation than the previous year, so the DSR was reduced in both plots, especially  
the ASK plot. Only after the vegetation had dried up in September 9th did a large infiltration  
process occurred.

The results show that in the Mu Us Sandy Land, whether there is vegetation coverage or  
not, DSR occurs in all seasons of the year and there is a significant difference in terms of DSR  
330 characteristics in the bare sand plot and the ASK plot. More specifically, the annual DSR of  
the bare sandy lands reaches 3.13 times of that of the ASK land. After the freeze-thaw period,  
the ASK root system begins to utilize the soil moisture, and soil moisture consequently  
decreases significantly.

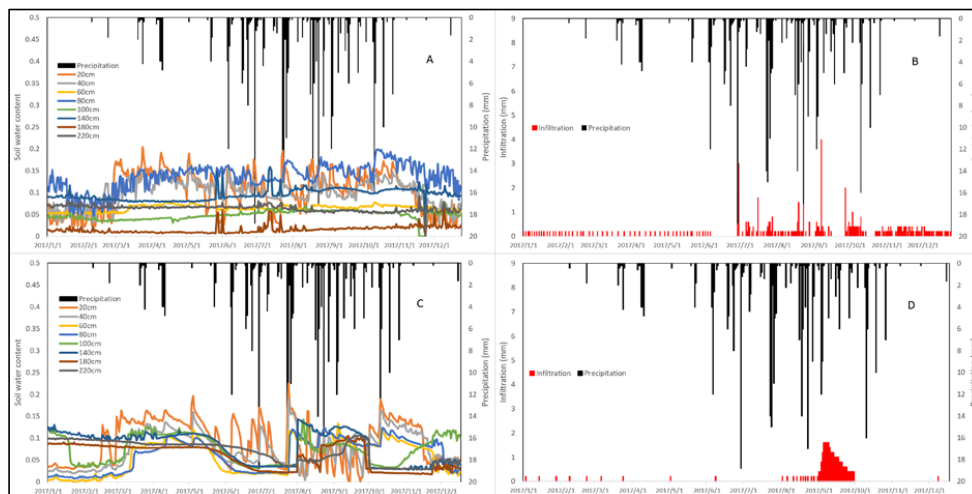

335 Figure 5 Effects of precipitation on soil moisture (A) and DSR (B) in bare sandy land plot; Effects of rainfall on soil  
moisture (C) and DSR (D) on ASK plot, 2017.

The relationship between precipitation and soil moisture content fluctuations and DSR in  
2018 is shown in Figure 6(A-D). There are 71 precipitation events throughout the year in 2018,  
with the maximum precipitation amount of 30 mm/d happened on August 31<sup>th</sup>, and the  
340 minimum precipitation amount of 0.2 mm/d happened 15 times throughout the year. On bare  
sandy land, there are 122 infiltration events throughout the year in 2018, with the maximum  
DSR of 1.6 mm/d happened on June 4<sup>th</sup>, and the minimum DSR of 0.2 mm/d happened 74  
times throughout the year. On ASK plot, there are 10 infiltration events throughout the year in



2016, with the maximum and the minimum DSR at the same amount of 0.2 mm/d happened  
345 10 times throughout the year.

The results show that under the heavy precipitation event on August 31<sup>th</sup>, 2018, DSR in the  
bare sandy land is obviously visible. The precipitation replenishes deep soil layer and shallow  
groundwater. However, in the ASK plot, a large percentage of precipitation-induced infiltration  
is intercepted by vegetation coverage, meaning that the sand-fixing vegetation strongly affects  
350 the infiltration process and has a greater impact on groundwater recharge. At the same time,  
DSR can be found in both plots in all seasons throughout the year.

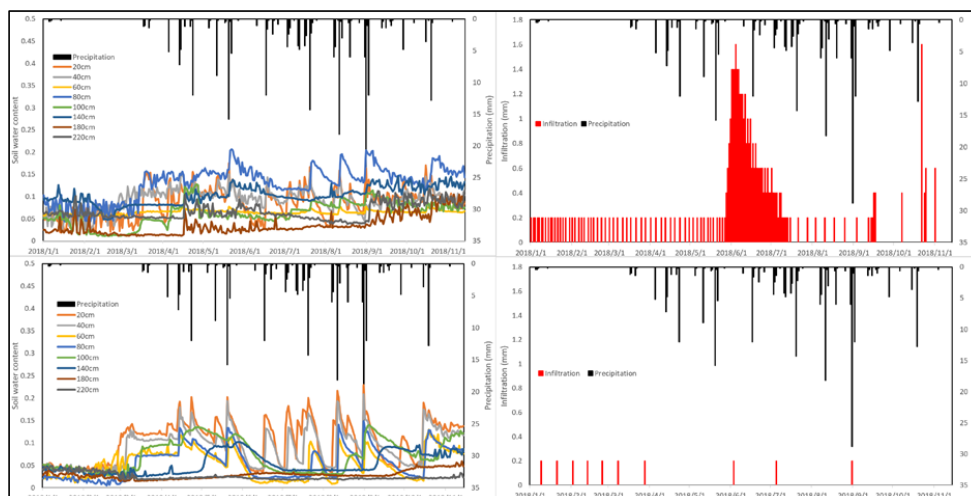

Figure 6 Effects of precipitation on soil moisture (A) and DSR (B) in bare sandy land plot; Effects of rainfall on soil  
moisture (C) and DSR (D) on ASK plot, 2018.

355 **3.5 Research on rain-feed ASK land water distribution**

There are many methods of measure surface layer evapotranspiration, but all have poor  
precise, because there are many factors that affect surface layer evapotranspiration and one  
cannot consider all impact factors, these factors including vegetation coverage, environmental  
and temperature factors. This study treats shallow soil as a whole layer and measures the  
360 amount of surface rainfall recharge, soil water storage and DSR directly. Based on the directly  
measured DSR and precipitation, the soil moisture storage change can be calculated using

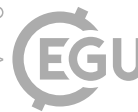

equation (1). During the five-month intermittent frozen period, soil moisture sensors provide less reliable soil water content measurements as the soil moisture sensors are designed to detect liquid water instead of solid ice. Therefore, this research uses the unfrozen time period from  
365 April 1<sup>th</sup> to November 30<sup>th</sup> to investigate the water distribution. The average soil water contents in the first week of April and the first week of November are used as the initial and final values of annual soil water storage, to calculate the change of soil water storage annually. Based on measured precipitation, DSR and soil water storage, and the water balance equation (1), the evapotranspiration can be accurately calculated and the results are shown in Table 4.

370 In 2016, the soil moisture reserve in the 220 cm soil layer of bare sand increased by 47.15 mm, and the annual evaporation was 134.04 mm, while the soil water storage of Artamisia plot increased by 31.95 mm, and the evapotranspiration was 342.25 mm. In 2017, the soil water storage of bare sandy plot increased by 13.77 mm, and the annual evaporation was 232.03 mm, while the soil water storage of Artamisia plot was reduced by 83.7 mm, and the  
375 evapotranspiration was 365.9 mm. In 2018, the soil water storage of bare sandy plot increased by 72.14 mm, and the annual evaporation was 121.46 mm, while the soil water storage of Artamisia plot increased by 2 mm, and the evapotranspiration was 202.63 mm. One should be noted that the change in soil water storage only represents the distribution of soil moisture from April to November, rather than the net increase of the whole year, because the water in the soil  
380 will continue to infiltrate to deep soil layer when the surface soil layer is frozen. As shown in Figure 3, there is no significant precipitation from January to June 2017, but deep infiltration has been occurring. Comparing the data from 2016 to 2018 in Table 5, it can be found that when there is sufficient precipitation, for example, in 2016, soil water storage increases and evapotranspiration increases as well. When the precipitation is low, the soil water storage decreases and the evapotranspiration decreases as well. The results show that after vegetation  
385 reconstruction in this area, the amount of DSR is significantly reduced, which may threaten the



safety of groundwater recharge; The precipitation water resource is concentrated in the shallow soil layer, vegetation gets sufficient moisture, then evaporation increases, and the regional microclimate environment will be improved. Evapotranspiration of plants in drought years is significantly reduced, which shows that vegetation will adapt to the environment by increasing or decreasing water consumption according to the amount of precipitation.

Table 4. Annual water distribution of ASK land and bare sand field

| Year | Field type     | Precipitation (mm) | DSR (mm) | Change of the SWS (mm) | Evapotranspiration (mm) |
|------|----------------|--------------------|----------|------------------------|-------------------------|
| 2016 | Bare sand plot | 464.8              | 283.6    | 47.15                  | 134.05                  |
|      | ASK plot       | 464.8              | 90.6     | 31.95                  | 342.25                  |
| 2017 | Bare sand plot | 313.4              | 67.6     | 13.77                  | 232.03                  |
|      | ASK plot       | 313.4              | 31.2     | -83.7                  | 365.9                   |
| 2018 | Bare sand plot | 245.2              | 51.6     | 72.14                  | 121.46                  |
|      | ASK plot       | 245.2              | 2        | 40.57                  | 202.63                  |

\*Note: SWS stands for soil water storage.

### 3.6 Influence of vegetation coverage on infiltration rate

In many aspects one can find the influence of vegetation on infiltration, the interception of precipitation by the aboveground part of vegetation, the interception and absorption of surface soil layer moisture by vegetation, the absorption and utilization of soil water by vegetation roots, the root system occupying soil voids to reduce infiltration speed, and the conduction effect of the catheter formed by death root on the infiltration ability. In this study, we consider the above-ground and underground parts of vegetation as a whole system, and compare the bare sand plot and ASK plot on the infiltration speed. During the observation period, the Precipitation-DSR interaction occurred alternatively. In order to show the characteristics of the two types of infiltration, we selected a typical infiltration process, and the result is shown in Figure 7. A precipitation of 90.2 mm/d was generated at 23:00 on July 7,



2016, and a DSR event was observed at 21:00 on July 9 on the bare sand plot. From the surface soil layer to 220 cm depth soil layer, the infiltrate process took 46 hours. The DSR of the ASK plot was observed at 8:00 on July 12, and the infiltrate process from the surface layer to the depth of 220 cm soil layer took 107 hours. The infiltration rate of ASK plot is 2.33 times of bare sandy land. One can see that vegetation cover significantly affects the infiltration rate.

410 However, under natural conditions, multiple precipitation processes occur in a short period, so it is difficult to distinguish the DSR event caused by a certain precipitation of different land coverage types under sufficient precipitation.

The results show that the characteristics of precipitation-induced DSR in the sandy land plot and the ASK plot are different. The two precipitation events leave marks on the bare sandy plot, leading to two spikes of DSR. In contrast, such spikes do not appear in the ASK plot, because water is utilized by the root system mostly and only a very small portion of the precipitation-induced infiltration can reach as far as 220 cm to be detected by the lysimeter.

415 ASK not only delays the infiltration rate but also reduces the total amount of DSR.

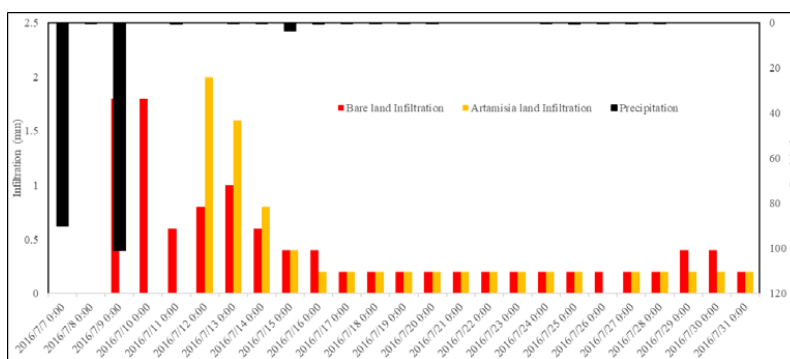

420

Figure 7. DSR response to precipitation on bare sandy plot and ASK plot

#### 4. Discussion

Monitoring and quantifying precipitation induced shallow groundwater recharge process is a long-lasting challenges in the hydrological communities, and it is especially difficult to do

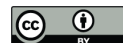

so in arid and semi-arid regions because of the spatiotemporally highly variable precipitation  
425 and complex soil moisture dynamics during the infiltration process (Newman et al., 2006).  
Studies of the interrelationship of precipitation and shallow groundwater is very important to  
local vegetation reconstruction, with or without anthropogenic mitigation (Ramier et al.,  
2009;Scibek et al., 2007). The difficulty of attempting to establish a relationship between  
precipitation and groundwater recharge is mainly reflected in the following aspects. Firstly,  
430 there are fewer instruments for direct long-term, large-scale measurements (Krishnaswamy et  
al., 2013). The commonly used methods such as double ring filter method, lysimeter, rainfall  
simulation method, water flux method and stable isotope based tracking methods all have  
certain specific restrictions (Sprenger et al., 2015;Groh et al., 2018). For instance, the  
heterogeneous nature of soil and point observations made with most above mentioned methods  
435 will make it difficult to conduct a basin scale analysis (Mousavi and Shourian, 2010). Secondly,  
ecological elements (such as ASK root systems in this study) are always changing, thus any  
monitoring methods that cannot continuously accommodate the ecological elements will miss  
a significant piece of the machinery of understanding the precipitation-recharge relationship.  
Our research here is an attempt to utilize a low-cost, field-based lysimeter method to monitor  
440 DSR for four years in Mu Us sandy land, a task has never reported before.

In semi-arid areas, Mu Us sandy land as an example, the main limiting factor for trees is  
available water resources (Gao et al., 2014;Skarpe, 1991). Therefore, the key to understand the  
vegetation ecosystem in semi-arid areas is to study the supply of water resources (Cheng et al.,  
2018;Cheng et al., 2017). The ASK has been in existence in the study area for more than 40  
445 years, so the purpose of this study is to find out whether there is sufficient water resource  
available in the region to support vegetation ecosystem, through the measurement of DSR. The  
“sustainable” growth of plants in this study means that water resource from precipitation can  
meet the growth needs of ASK, and can still have an excess amount of water to replenish deep



soil layer. In this study, the soil moisture distribution has been studied by using the newly  
450 designed lysimeter to measure whether the soil layer below the root layer could produce DSR  
or not.

In the dry years, the differences in soil water storage and DSR between the two plots are  
significant, taking 2018 as an example. At the beginning of the experiment, the soil moisture  
storage in the ASK plot is 126.16 mm, and the soil moisture storage of bare sandy land is  
455 147.22 mm. At the end of the experiment, the soil moisture storage in the ASK plot is 166.72  
mm, which is 40.56 mm less than that at the beginning of the experiment. The soil moisture  
storage of the bare sandy plot at the end of the experiment is 219.37 mm, which is 72.15 mm  
more than its counterpart at the beginning of the experiment. There is no significant difference  
in soil water storage, but the DSR difference is obvious. The DSR of bare sand is 51.6 mm,  
460 and that of ASK plot is only 2 mm. Although the DSR is significantly reduced, even in the dry  
years, there is still a small amount of DSR, indicating that the selection of ASK as sand-fixing  
vegetation in this area is a suitable plant species. Another interesting point to note is that ASK  
is capable of adjusting their own growth conditions based on the available moisture recharge,  
and a larger moisture recharge will result in a faster growth rate of such plants. When the  
465 rainfall is insufficient, the evapotranspiration of ASK is reduced from 342.25 mm in 2016 to  
202.63 mm in 2018.

As surface soil is frozen and ASK enters dormancy during winter in the research site,  
snow can only accumulate on the surface and cannot recharge soil moisture. However, moisture  
in deep soil continues to infiltrate downwards because of the driving force of gravity. This is  
470 particularly true in bare sandy land as a large amount of soil moisture has been accumulated at  
the start of the frozen period. A portion of those accumulated soil moisture will slowly infiltrate  
downwards and recharge groundwater reservoir. Because the amount of snowfall in winter is



difficult to calculate, the amount of frozen water accumulated in winter cannot be obtained.

How to accurately obtain the details of winter infiltration requires further research.

## 475 5. Conclusions

This research uses a newly designed lysimeter to monitor shallow soil layer infiltration, and results show that in order to absorb more precipitation moisture, ASK develops a horizontal root system and retains more water in the shallow soil layer. ASK has shown to be effective in fixing the mobile sand and increasing the proportion of fine particles in the sandy land. ASK  
480 changes its own evapotranspiration amount to adapt to the annual precipitation changes. Under the existing precipitation conditions, the ASK community can develop healthily, as a small amount of precipitation can recharge the groundwater, even in dry year. This indicates that precipitation in the area is sufficient to meet the needs of vegetation water consumption. However, with the unforeseeable global warming and abnormal precipitation events, semi-arid  
485 region may become drier and the ASK community may be seriously affected. Therefore, continuously monitoring the key controlling factors associated with the ecological system in the semi-arid region is needed.

The following conclusions can be drawn from this research:

- 1) In Mu Us sandy land, the ASK root system develops horizontally to absorb more  
490 precipitation-induced infiltration. The root system mainly concentrates within the upper 40 cm deep soil layer.
- 2) After 40 years of vegetation reconstruction, the soil particle size distribution has been significantly changed. Specifically, the sandy soil mainly consisting of medium sand (50.53%) grows into a sandy soil mainly consisting of fine sand (60.53%). Vegetation  
495 is particularly important in semi-arid areas since it directly changes the composition of soil.





- 3) The yearly DSR in the ASK sand-fixing experimental plot is from 2 mm to 90.6 mm. In contrast, the yearly DSR in the bare sand plot is from 51.6 mm to 283.6 mm. This shows that the rainfed vegetation has reduced DSR substantially but there is still a small amount of recharge left to replenish the deep soil moisture, implying that the current ASK community is still hydrologically self-sustainable because it does not consume all the water moisture replenished by precipitation and the DSR has not been reduced to zero.
- 4) Under the conditions of sufficient precipitation, the infiltration rate of bare sandy land is 2.33 times of ASK land.

### Acknowledgements

This research was supported by the Major Program of the National Natural Science Foundation of China, National Science and Technology Major Project and Ministry of Science and Technology of China (No. 2017ZX07101004, No. 2018YFC0507100, NO. 2015ZCQ-SB-01, NO. 2019ZD003), We gratefully acknowledge the Beijing Municipal Education Commission for their financial support through Innovative Transdisciplinary Program "Ecological Restoration Engineering".

### References

- [1] Bestelmeyer, B. T., Okin, G. S., Duniway, M. C., Archer, S. R., Sayre, N. F., Williamson, J. C., and Herrick, J. E.: Desertification, land use, and the transformation of global drylands, *Frontiers in Ecology and the Environment*, 13, 28-36, 2015.
- [2] Chen, C., Park, T., Wang, X., Piao, S., Xu, B., Chaturvedi, R. K., Fuchs, R., Brovkin, V., Ciais, P., and Fensholt, R.: China and India lead in greening of the world through land-use management, *Nature Sustainability*, 2, 122, 2019.
- [3] Cheng, Y., Zhan, H., Yang, W., Dang, H., and Li, W.: Is annual recharge coefficient a valid concept in arid and semi-arid regions, *Hydrol. Earth Syst. Sci.*, 21, 5031-5042, 2017.
- [4] Cheng, Y., Li, Y., Zhan, H., Liang, H., Yang, W., Zhao, Y., and Li, T.: New comparative experiments of different soil types for farmland water conservation in arid regions, *Water*, 10, 298, 2018.
- [5] D'Odorico, P., Bhattachan, A., Davis, K. F., Ravi, S., and Runyan, C. W.: Global desertification: drivers and feedbacks, *Advances in Water Resources*, 51, 326-344, 2013.
- [6] Dregne, H. E., and Chou, N.-T.: Global desertification dimensions and costs, *Degradation and restoration of arid lands*, 73-92, 1992.
- [7] Duan, H., Yan, C., Tsunekawa, A., Song, X., Li, S., and Xie, J.: Assessing vegetation dynamics in the Three-North Shelter Forest region of China using AVHRR NDVI data, *Environmental Earth Sciences*, 64, 1011-1020, 2011.
- [8] Fearnough, W., Fullen, M., Mitchell, D., Trueman, I., and Zhang, J. J. G.: Aeolian deposition and its effect on soil and vegetation changes on stabilised desert dunes in northern China, 23, 171-182, 1998.

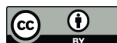

- [9] Gao, Y., Zhu, X., Yu, G., He, N., Wang, Q., and Tian, J.: Water use efficiency threshold for terrestrial ecosystem carbon sequestration in China under afforestation, *Agricultural and Forest Meteorology*, 195, 32-37, 2014.
- [10] Groh, J., Stump, C., Lücke, A., Pütz, T., Vanderborght, J., and Vereecken, H.: Inverse estimation of soil hydraulic and transport parameters of layered soils from water stable isotope and lysimeter data, *Vadose Zone Journal*, 17, 2018.
- 535 [11] Hanjie, W., and Hao, Z.: A simulation study on the eco-environmental effects of 3N Shelterbelt in North China, *Global and Planetary Change*, 37, 231-246, [https://doi.org/10.1016/S0921-8181\(02\)00208-4](https://doi.org/10.1016/S0921-8181(02)00208-4), 2003.
- [12] Krishnaswamy, J., Bonell, M., Venkatesh, B., Purandara, B. K., Rakesh, K., Lele, S., Kiran, M., Reddy, V., and Badiger, S.: The groundwater recharge response and hydrologic services of tropical humid forest ecosystems to use and reforestation: Support for the “infiltration-evapotranspiration trade-off hypothesis”, *Journal of Hydrology*, 498, 191-209, 2013.
- 540 [13] Li, X. R., Ma, F. Y., Xiao, H. L., Wang, X. P., and Kim, K. C.: Long-term effects of revegetation on soil water content of sand dunes in arid region of Northern China, *Journal of Arid Environments*, 57, 1-16, [https://doi.org/10.1016/S0140-1963\(03\)00089-2](https://doi.org/10.1016/S0140-1963(03)00089-2), 2004.
- [14] Liu, J., and Diamond, J.: China's environment in a globalizing world, *Nature*, 435, 1179, 10.1038/4351179a, 2005.
- 545 [15] Liu, X., He, Y., Zhao, X., Zhang, T., Zhang, L., Ma, Y., Yao, S., Wang, S., and Wei, S.: Characteristics of deep drainage and soil water in the mobile sandy lands of Inner Mongolia, northern China, *Journal of Arid Land*, 7, 238-250, 10.1007/s40333-014-0095-4, 2015.
- [16] Mousavi, S. J., and Shourian, M.: Adaptive sequentially space-filling metamodeling applied in optimal water quantity allocation at basin scale, *Water Resources Research*, 46, 2010.
- 550 [17] Newman, B. D., Vivoni, E. R., and Groffman, A. R.: Surface water-groundwater interactions in semiarid drainages of the American southwest, *Hydrological Processes: An International Journal*, 20, 3371-3394, 2006.
- [18] Pei, S., Fu, H., Wan, C. J. A., Ecosystems, and Environment: Changes in soil properties and vegetation following enclosure and grazing in degraded Alxa desert steppe of Inner Mongolia, China, 124, 33-39, 2008.
- 555 [19] Ramier, D., Boulain, N., Cappelaere, B., Timouk, F., Rabanit, M., Lloyd, C. R., Boubkraoui, S., Métayer, F., Descroix, L., and Wawrzyniak, V.: Towards an understanding of coupled physical and biological processes in the cultivated Sahel-1. Energy and water, *Journal of Hydrology*, 375, 204-216, 2009.
- [20] Reynolds, J. F., Smith, D. M. S., Lambin, E. F., Turner, B., Mortimore, M., Batterbury, S. P., Downing, T. E., Dowlatabadi, H., Fernández, R. J., and Herrick, J. E.: Global desertification: building a science for dryland development, *science*, 316, 847-851, 2007a.
- 560 [21] Reynolds, J. F., Smith, D. M. S., Lambin, E. F., Turner, B. L., Mortimore, M., Batterbury, S. P. J., Downing, T. E., Dowlatabadi, H., Fernández, R. J., Herrick, J. E., Huber-Sannwald, E., Jiang, H., Leemans, R., Lynam, T., Maestre, F. T., Ayarza, M., and Walker, B.: Global Desertification: Building a Science for Dryland Development, *Science*, 316, 847-851, 10.1126/science.1131634, 2007b.
- [22] Scibek, J., Allen, D. M., Cannon, A. J., and Whitfield, P. H.: Groundwater-surface water interaction under scenarios of climate change using a high-resolution transient groundwater model, *Journal of Hydrology*, 333, 165-181, 2007.
- 565 [23] Skarpe, C.: Spatial patterns and dynamics of woody vegetation in an arid savanna, *Journal of Vegetation Science*, 2, 565-572, 1991.
- [24] Sprenger, M., Volkman, T. H., Blume, T., and Weiler, M.: Estimating flow and transport parameters in the unsaturated zone with pore water stable isotopes, *Hydrology and Earth System Sciences*, 2015.
- 570 [25] Su, Y. Z., and Lin Zhao, H.: Soil properties and plant species in an age sequence of Caragana microphylla plantations in the Horqin Sandy Land, north China, *Ecological Engineering*, 20, 223-235, 2003.
- [26] Tao, W.: Aeolian desertification and its control in Northern China, *International Soil and Water Conservation Research*, 2, 34-41, [https://doi.org/10.1016/S2095-6339\(15\)30056-3](https://doi.org/10.1016/S2095-6339(15)30056-3), 2014.
- 575 [27] Wang, S., Cornelis van Kooten, G., and Wilson, B.: Mosaic of reform: forest policy in post-1978 China, *Forest Policy and Economics*, 6, 71-83, [https://doi.org/10.1016/S1389-9341\(02\)00078-3](https://doi.org/10.1016/S1389-9341(02)00078-3), 2004.
- [28] Wang, T., Sun, J.-g., Han, H., and Yan, C.-z.: The relative role of climate change and human activities in the desertification process in Yulin region of northwest China, *Environmental Monitoring and Assessment*, 184, 7165-7173, 10.1007/s10661-011-2488-6, 2012.
- 580 [29] Wang, X., Zhang, C., Hasi, E., and Dong, Z.: Has the Three Norths Forest Shelterbelt Program solved the desertification and dust storm problems in arid and semiarid China?, *Journal of Arid Environments*, 74, 13-22, 2010a.
- [30] Wang, X. M., Zhang, C. X., Hasi, E., and Dong, Z. B.: Has the Three Norths Forest Shelterbelt Program solved the desertification and dust storm problems in arid and semiarid China?, *Journal of Arid Environments*, 74, 13-22, <https://doi.org/10.1016/j.jaridenv.2009.08.001>, 2010b.
- 585 [31] Wang, Y., Zhao, H.-L., and Zhao, X.-Y.: Effects of land use intensity on the restoration capacity of sandy land vegetation and soil moisture in fenced sandy land in desert area, *Contemporary Problems of Ecology*, 6, 128-136, 2013.
- [32] Yan, Y., Xin, X., Xu, X., Wang, X., Yang, G., Yan, R., Chen, B. J. P., and soil: Quantitative effects of wind erosion on the soil texture and soil nutrients under different vegetation coverage in a semiarid steppe of northern China, 369, 585-598, 2013.
- 590 [33] Yu, C., Muñoz-Carpena, R., Gao, B., and Perez-Ovalla, O. J. J. o. h.: Effects of ionic strength, particle size, flow rate, and vegetation type on colloid transport through a dense vegetation saturated soil system: Experiments and modeling, 499, 316-323, 2013.
- [34] Zha, Y., and Gao, J.: Characteristics of desertification and its rehabilitation in China, *Journal of Arid Environments*, 37, 419-432, <https://doi.org/10.1006/jare.1997.0290>, 1997.
- 595 [35] Zhang, G.-H., Liu, G.-B., Wang, G.-L., Wang, Y.-X. J. J. o. S., and Conservation, W.: Effects of vegetation cover and rainfall intensity on sediment-associated nitrogen and phosphorus losses and particle size composition on the Loess Plateau, 66, 192-200, 2011.
